# Supplementary material for: Nothing Regular about the Regulins: Distinct Functional Properties of SERCA Transmembrane Peptide Regulatory Subunits
Source: MDPI journal article supplement (doi:10.3390/ijms22168891), 2021-08-18
Supplement: s1 [file s1]

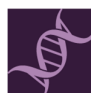

**Table S1:** Molecular contacts between phospholamban (PLN) and SERCA.

| PLN residues                                            | SERCA residues |                |                |
|---------------------------------------------------------|----------------|----------------|----------------|
|                                                         | M2             | M6             | M9             |
| Ala24                                                   |                |                | Trp932         |
| Ala27                                                   |                | Phe809         | Trp932         |
| Leu28                                                   |                |                | Trp932         |
| Ile33                                                   | Trp107         |                |                |
| Asn34                                                   |                | Gly801, Thr805 |                |
| Phe35                                                   |                |                | Leu939         |
| Ile38                                                   |                | Leu797         | Leu943         |
| Leu42                                                   |                | Trp794         |                |
| Ile45                                                   |                |                | Leu953, Ile956 |
| <b>13 contacts:</b> 1 with M2, 5 with M6, and 7 with M9 |                |                |                |

\*Based on the reported crystal structure of the SERCA-PLN complex (PDB code 4KYT).

**Table S2:** Molecular contacts between sarcolipin (SLN) and SERCA.

| SLN residues                                            | SERCA residues |                |                |
|---------------------------------------------------------|----------------|----------------|----------------|
|                                                         | M2             | M6             | M9             |
| Leu8                                                    |                | Ala806         |                |
| Asn11                                                   |                | Gly801, Thr805 |                |
| Phe12                                                   |                | Leu802         | Leu939         |
| Val14                                                   | Trp107         |                |                |
| Val15                                                   |                | Leu797         | Leu943         |
| Val19                                                   |                | Trp794         | Leu946, Leu953 |
| Ile22                                                   | Val93, Leu96   |                |                |
| Trp23                                                   |                |                | Leu953         |
| Val26                                                   |                |                | Pro952         |
| Tyr29                                                   | Phe88          |                |                |
| <b>15 contacts:</b> 4 with M2, 5 with M6, and 6 with M9 |                |                |                |

\*Based on the reported crystal structures of the SERCA-SLN complex (PDB codes 3W5A and 4H1W).

**Table S3:** Molecular contacts between dwarf open reading frame (DWORF) and SERCA.

| DWORF residues                                          | SERCA residues      |        |                |
|---------------------------------------------------------|---------------------|--------|----------------|
|                                                         | M2                  | M6     | M9             |
| His11                                                   |                     |        | Ser936         |
| Val14                                                   | Trp107              | Leu802 |                |
| Ile16                                                   | Val104, Trp107      |        |                |
| Ile23                                                   | Ile103              |        |                |
| Val24                                                   |                     |        | Leu953         |
| Ile27                                                   |                     |        | Ile956, Phe957 |
| Ile28                                                   |                     |        | Leu953         |
| Ile30                                                   | Val89, Phe92, Val93 |        |                |
| Tyr31                                                   |                     |        | Pro952, Ile956 |
| Phe34                                                   | Phe88, Phe92        |        |                |
| <b>17 contacts:</b> 9 with M2, 1 with M6, and 7 with M9 |                     |        |                |

\*Based on previously published molecular model of the SERCA-DWORF complex (Fisher et al., *eLife*, 2021).

**Table S4:** Molecular contacts between myoregulin (MLN) and SERCA.

| MLN residues                                            | SERCA residues |        |                |
|---------------------------------------------------------|----------------|--------|----------------|
|                                                         | M2             | M6     | M9             |
| Glu20                                                   |                |        | Trp932         |
| Arg24                                                   |                | Thr805 | Trp932         |
| Leu26                                                   | Trp107         |        |                |
| Lys27                                                   | Gln108         |        |                |
| Ile28                                                   |                |        | Leu939         |
| Phe30                                                   | Ile103         |        |                |
| Val34                                                   | Leu96          |        |                |
| Ile39                                                   |                |        | Leu953, Phe957 |
| Tyr41                                                   | Phe88, Phe92   |        |                |
| <b>12 contacts:</b> 6 with M2, 1 with M6, and 5 with M9 |                |        |                |

\*Based on the molecular model shown in Figure 6.

**Table S5:** Molecular contacts between another-regulin (ALN) and SERCA.

| ALN residues                                             | SERCA residues      |        |                |
|----------------------------------------------------------|---------------------|--------|----------------|
|                                                          | M2                  | M6     | M9             |
| His42                                                    | Trp107, Asn111      |        |                |
| Leu46                                                    | Ile103, Trp107      |        |                |
| Asp47                                                    |                     | Leu802 |                |
| Leu48                                                    |                     | Leu802 |                |
| Phe51                                                    |                     |        | Leu943, Leu946 |
| Phe54                                                    | Leu96               | Trp794 | Phe957         |
| Val57                                                    | Leu96               |        |                |
| Phe61                                                    | Val89, Phe88, Phe92 |        |                |
| Leu65                                                    | Val89               |        |                |
| <b>18 contacts:</b> 10 with M2, 3 with M6, and 3 with M9 |                     |        |                |

\*Based on the molecular model shown in Figure 8.
